# Supplementary material for: A superhard and superdense carbon allotrope with all-sp3 bonded helical chains of five-membered rings
Source: Royal Society of Chemistry journal article supplement (doi:10.1039/d4tc04628e), 2025-01-01
Supplement: d4tc04628e1.pdf [file d4tc04628e1.pdf]

Supplementary information

## **A superhard and superdense carbon allotrope with all- $sp^3$ bonded helical chains of five-membered rings**

Yuan Tang,<sup>a</sup> Meng Hu,<sup>\*a</sup> Wenyuan Zhang,<sup>a</sup> Jiwei Pang,<sup>a</sup> Mengdong Ma,<sup>b</sup> Penghui Li,<sup>cd</sup> Julong He<sup>c</sup> and Jianning Ding<sup>ae</sup>

<sup>a</sup> School of Mechanical Engineering, Jiangsu University, Zhenjiang 212013, China.

<sup>b</sup> State Key Laboratory of Crane Technology, Yanshan University, Qinhuangdao 066004, China

<sup>c</sup> Center for High Pressure Science, State Key Laboratory of Metastable Materials Science and Technology, Yanshan University, Qinhuangdao 066004, China

<sup>d</sup> Center for X-mechanics, Institute of Applied Mechanics, Zhejiang University, Hangzhou 310027, China.

<sup>e</sup> School of Mechanical Engineering, Yangzhou University, Yangzhou 225127, China

\*E-mail address: humeng@ujs.edu.cn (M. Hu).

## The crystallographic information file (CIF) for the T-C<sub>10</sub> crystal structure

```
data_T-C10
_audit_creation_date      2024-10-30
_audit_creation_method    'Materials Studio'
_symmetry_space_group_name_H-M 'P42/N'
_symmetry_Int_Tables_number 86
_symmetry_cell_setting    tetragonal
loop_
_symmetry_equiv_pos_as_xyz
  x,y,z
  -x,-y,z
  -y+1/2,x+1/2,z+1/2
  y+1/2,-x+1/2,z+1/2
  -x+1/2,-y+1/2,-z+1/2
  x+1/2,y+1/2,-z+1/2
  y,-x,-z
  -y,x,-z
_cell_length_a           2.7846
_cell_length_b           2.7846
_cell_length_c           7.0642
_cell_angle_alpha        90.0000
_cell_angle_beta         90.0000
_cell_angle_gamma        90.0000
loop_
_atom_site_label
_atom_site_type_symbol
_atom_site_fract_x
_atom_site_fract_y
_atom_site_fract_z
_atom_site_U_iso_or_equiv
_atom_site_adp_type
_atom_site_occupancy
C1  C  0.84986  0.27122  0.84772  0.00000  Uiso  1.00
C2  C  0.00000  0.00000  0.50000  0.00000  Uiso  1.00
loop_
_geom_bond_atom_site_label_1
_geom_bond_atom_site_label_2
_geom_bond_distance
_geom_bond_site_symmetry_2
_ccdc_geom_bond_type
C1  C1  1.726  2_755  S
C1  C1  1.524  2_765  S
C1  C2  1.585  3  S
C1  C1  1.493  5_656  S
C2  C1  1.585  3_544  S
C2  C1  1.585  4_454  S
C2  C1  1.585  6_446  S
C2  C1  1.585  5_556  S
```

To verify the consistency of the results obtained from different calculation methods, we performed geometry optimization and property characterization on T-C<sub>10</sub> using both CASTEP and VASP. As shown in Table S1, the lattice parameters optimized by CASTEP and VASP are identical, and the corresponding elastic constants demonstrate excellent agreement. Additionally, the band gap of T-C<sub>10</sub> simulated with CASTEP is 3.31 eV (Fig. S2), which is in close agreement with the 3.34 eV obtained from VASP calculations (Fig. 2e). We also used CASTEP to calculate the stress-strain curves of T-C<sub>10</sub> along specific crystal orientations (Fig. S3). The tensile strengths of T-C<sub>10</sub> along the [001] and [100] directions were found to be 132.2 and 26.0 GPa, respectively, with corresponding strains of 0.21 and 0.06, which match the values obtained from VASP calculations.

**Table S1.** The lattice constants  $a$ ,  $b$ , and  $c$  (Å) and elastic constants  $C_{ij}$ s (GPa) of T-C<sub>10</sub> by different calculation methods.

| Structure         | Methods | Lattice            | $C_{11}$ | $C_{12}$ | $C_{13}$ | $C_{16}$ | $C_{33}$ | $C_{44}$ | $C_{66}$ |
|-------------------|---------|--------------------|----------|----------|----------|----------|----------|----------|----------|
| T-C <sub>10</sub> | VASP    | $a=b=2.78, c=7.06$ | 798.1    | 125.1    | 115.2    | -57.9    | 1302.1   | 553.5    | 482.3    |
|                   | CASTEP  | $a=b=2.78, c=7.06$ | 785.3    | 117.2    | 108.0    | -57.8    | 1289.6   | 549.9    | 475.7    |

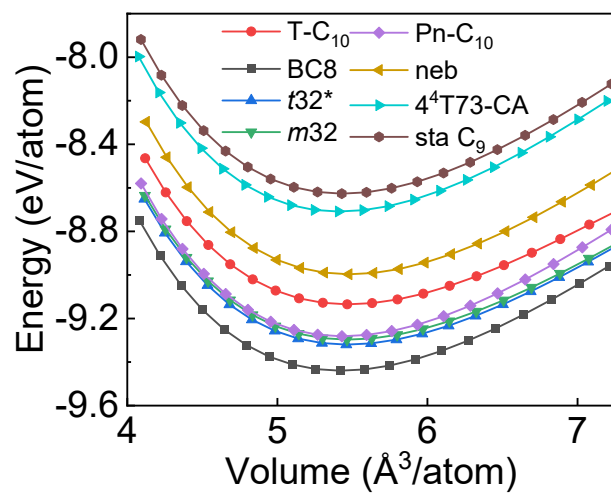

**Fig. S1** The total energy as a function of volume per atom for T-C<sub>10</sub> in comparison with other superhard carbon allotropes.

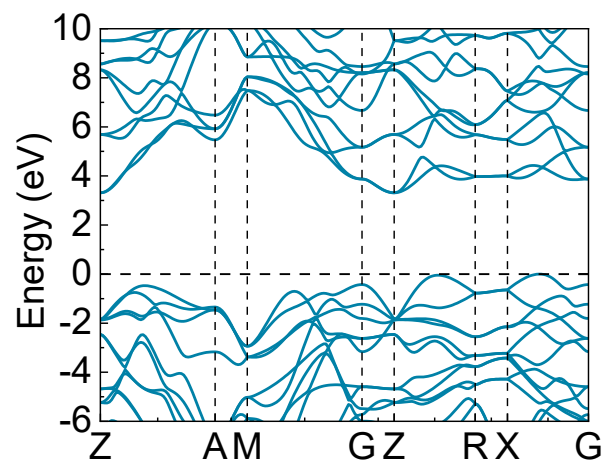

**Fig. S2** Electronic band structure of T-C<sub>10</sub>, calculated using the LDA functional implemented in the CASTEP code. The conduction band minimum (CBM) resides at the Z symmetry point, while the valence band maximum (VBM) emerges between the X and G points. The simulated band gap is 3.31 eV.

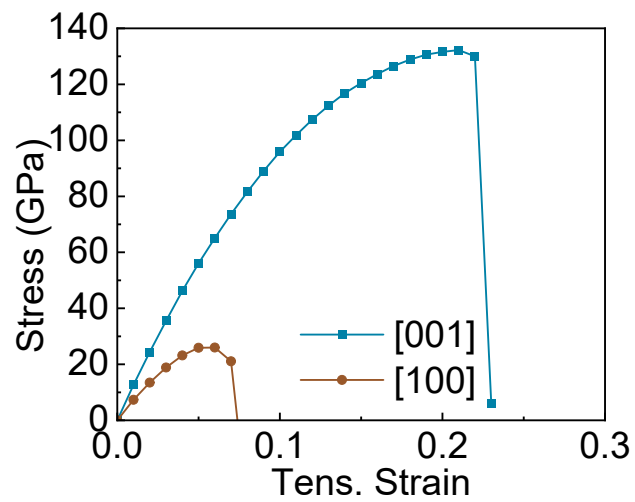

**Fig. S3** Strain–stress relationships under the tensile (Tens.) deformations of T-C<sub>10</sub> along the crystal orientations of [001] and [100], calculated using CASTEP code.
